# Supplementary material
Source: PubMed Central journal article supplement (PMC4629654)
Supplement: 10_109_sup.pdf [file 10_109_sup.pdf]

## Supplementary Materials

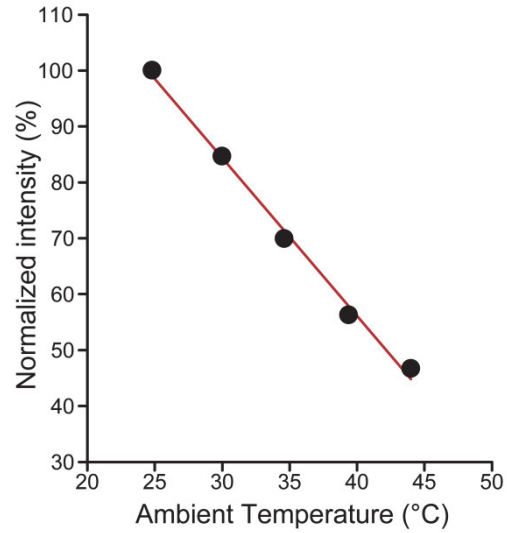

**Supplementary Figure S1** Calibration of thermometer sheet using the stage top incubator. Fluorescence intensity of Eu-TTA was measured at indicated ambient temperatures. Data were normalized to the fluorescence intensity at 25°C. The slope of the linear fit (solid line) was  $-2.8\%/^{\circ}\text{C}$ .

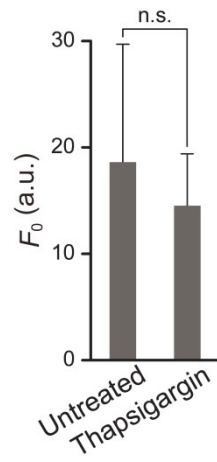

**Supplementary Figure S2** Comparison of  $F_0$  between untreated and thapsigargin-treated cells. Data represent mean $\pm$ standard deviation of  $F_0$ . Original data were taken from untreated (n=14 cells) or thapsigargin-treated cells (n=15 cells) in Fig. 2. The p value is 0.27.

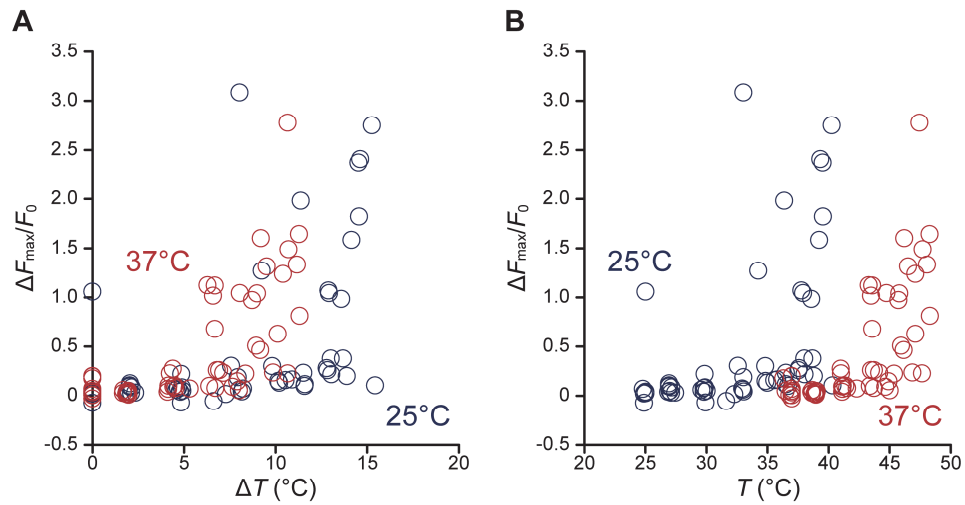

**Supplementary Figure S3** Effect of ambient temperature on thermosensitivity for a short (2 s) heat pulse (individual data). (A) Relationship between  $\Delta T$  and  $\Delta F_{\max}/F_0$ . (B) Relationship between  $T$  (=ambient temperature+ $\Delta T$ ) and  $\Delta F_{\max}/F_0$ . Plots of data at 25°C (n=58 cells; blue) and 37°C (n=57 cells; red) are shown. Data at each time point were normalized by the average value for 5 s before heating ( $F_0$ ).

**Supplementary Movie S1** Change in  $\Delta T$  upon IR irradiation at 1455 nm. The laser power was 2.14 W. Scale bar, 20  $\mu\text{m}$ .

**Supplementary Movie S2**  $\text{Ca}^{2+}$  burst induced by a microscopic heat pulse in an untreated WI-38 fibroblast. Image of  $\Delta F/F_0$  corresponding to fluo-4 fluorescence; the cell is outlined in white. The laser power was 2.14 W. Scale bar, 20  $\mu\text{m}$ .
